# Supplementary material for: Discrepancies between primary care patients’ and professionals’ perceptions of person-centered care and shared decision-making: A cross-sectional study
Source: Research Square preprint supplement (doi:10.21203/rs.3.rs-8319023/v1), 2026-01-22
Supplement: Supplementary file 1 [file d56ae85eb467610518727335.docx]

**Supplementary materials**

Table S1. Comparison of PACIC Item Scores Between Healthcare Professionals and Patients: Item Wording, Mean, standard deviation (SD), and p-Values for Paired Sample Tests

| **PACIC ítems** |  | **Mean HCPs (SD)** | **Mean patients (SD)** | **p-value HCPs**  **Vs patients** |
| --- | --- | --- | --- | --- |
| **HCP version** | **Patient adapted version** |
| Item 1 | 1. Asked for my ideas when we made a treatment plan. | 3.6 (0.8) | 2.0 (0.6) | < 0.001 |
| Item 2 | 2. Given choices about treatment to think about. | 3.4 (0.6) | 1.7 (0.5) | <0.001 |
| Item 3 | 3. Asked to talk about any problems with my medicines or their effects. | 3.9 (0.9) | 2.9 (0.7) | <0.001 |
| Item 4 | 4. Given a written list of things I should do to improve my health. | 3.0 (1.0) | 2.3 (0.6) | <0.001 |
| Item 5 | 5. Satisfied that my care was well organized. | 3.5 (0.7) | 4.3 (0.3) | <0.001 |
| Item 6 | 6. Shown how what I did to take care of my illness influenced my condition. | 4.0 (0.7) | 2.8 (0.6) | <0.001 |
| Item 7 | 7. Asked to talk about my goals in caring for my illness. | 2.9 (0.8) | 2.4 (0.6) | <0.001 |
| Item 8 | 8. Helped to set specific goals to improve my eating or exercise. | 3.5 (0.8) | 3.3 (0.5) | 0.076 |
| Item 9 | 9. Given a copy of my treatment plan. | 3.7 (0.9) | 3.1 (0.7) | < 0.001 |
| Item 10 | 10. Encouraged to go to a specific group or class to help me cope with my chronic illness. | 2.8 (1.0) | 1.4 (0.4) | < 0.001 |
| Item 11 | 11. Asked questions, either directly or on a survey, about my health habits. | 3.0 (1.0) | 2.8 (0.5) | 0.313 |
| Item 12 | 12. Sure that my doctor or nurse thought about my values and my traditions when they recommended treatments to me. | 3.2 (1.0) | 3.7 (0.7) | 0.002 |
| Item 13 | 13. Helped to make a treatment plan that I could do in my daily life. | 3.6 (0.8) | 3.4 (0.6) | 0.165 |
| Item 14 | 14. Helped to plan ahead to manage my disease/condition even in difficult times. | 3.1 (0.8) | 2.5 (0.6) | < 0.001 |
| Item 15 | 15. Asked how my chronic illness affects my life. | 3.5 (0.9) | 2.2 (0.6) | < 0.001 |
| Item 16 | 16. Contacted after visit to see how things were going. | 3.4 (0.9) | 1.8 (0.5) | < 0.001 |
| Item 17 | 17. Encouraged to attend programs in the community that could help me. | 2.7 (0.9) | 1.3 (0.3) | < 0.001 |
| Item 18 | 18. Referred to a dietitian, health educator, or counselor. | 2.3 (1.0) | 1.2 (0.3) | < 0.001 |
| Item 19 | 19. Told how my visits with other types of doctors, like the eye doctor or surgeon, helped my treatment. | 3.8 (0.7) | 1.9 (0.5) | < 0.001 |
| Item 20 | 20. Asked how my visits with other doctors were going. | 4.2 (0.8) | 2.8 (0.8) | < 0.001 |

HCPs: Healthcare professionals

The columns under Response from professionals show frequency (percentage). The means and standard deviations in the patient column were calculated based on the average scores of all patients assigned to each professional

Table S2. Comparison of SDM-Q-Doc and SDM-Q-9 Item Scores Between Patients and Healthcare Professionals: Item Wording, Mean (SD), and p-Values for Paired Sample Tests

| **SDM-Q-Doc** | **SDM-Q-9** | **Mean Professionals (SD)** | **Mean Patients**  **(SD)** | **p-value professional**  **Vs patients** |
| --- | --- | --- | --- | --- |
| Item 1 | Item 1 | 3.9 (0.8) | 1.6 (1.2) | <0.001 |
| Item 2 | Item 2 | 3.0 (0.9) | 1.6 (1.2) | <0.001 |
| Item 3 | Item 3 | 3.8 (0.6) | 1.6 (0.8) | <0.001 |
| Item 4 | Item 4 | 3.6 (1.0) | 1.9 (0.9) | <0.001 |
| Item 5 | Item 5 | 4.0 (0.7) | 3.7 (0.6) | 0.041 |
| Item 6 | Item 6 | 3.4 (0.9) | 1.2 (0.8) | <0.001 |
| Item 7 | Item 7 | 3.2 (0.9) | 1.6 (1.0) | <0.001 |
| Item 8 | Item 8 | 3.1 (1.0) | 1.3 (0.8) | <0.001 |
| Item 9 | Item 9 | 3.6 (1.0) | 3.6 (0.7) | 0.774 |

The means and standard deviations in the patient column were calculated based on the average scores of all patients assigned to each professional

Table S3. Healthcare Professionals’ Attitudes Toward Concordance (LATconII): Frequency and Mean (SD) of Responses

|  | **Responses from professionals, n (%)** | | | | |
| --- | --- | --- | --- | --- | --- |
| **LATconII** | **Strongly disagree** | **Disagree** | **Agree** | **Strongly agree** | **Mean (SD)** |
| Item 1 | 1 (2) | 2 (4) | 30 (60) | 17 (34) | 2.3 (0.6) |
| Item 2 | 0 (0) | 1 (2) | 25 (50) | 24 (48) | 2.5 (0.5) |
| Item 3 | 0 (0) | 6 (12) | 21 (42) | 23 (46) | 2.3 (0.7) |
| Item 4 | 0 (0) | 10 (20) | 15 (30) | 25 (50) | 2.3 (0.8) |
| Item 5 | 0 (0) | 0 (0) | 11 (22) | 39 (78) | 2.8 (0.4) |
| Item 6 | 0 (0) | 1 (2) | 20 (40) | 29 (58) | 2.6 (0.5) |
| Item 7 | 0 (0) | 1 (2) | 13 (26) | 36 (72) | 2.7 (0.5) |
| Item 8 | 0 (0) | 1 (2) | 17 (34) | 32 (64) | 2.6 (0.5) |
| Item 9 | 0 (0) | 0 (0) | 22 (44) | 28 (56) | 2.6(0.5) |
| Item 10 | 0 (0) | 0 (0) | 13 (26) | 37 (74) | 2.7 (0.4) |
| Item 11 | 13 (26) | 25 (50) | 8 (16) | 4 (8) | 1.1 (0.9) |
| Item 12 | 0 (0) | 0 (0) | 25 (50) | 25 (50) | 1.8 (0.7) |
| Item 13 | 0 (0) | 0 (0) | 19 (38) | 31 (62) | 2.3 (0.8) |
| Item 14 | 2 (4) | 14 (28) | 27 (54) | 7 (14) | 1.8 (0.8) |
| Item 15 | 3 (6) | 3 (6) | 20 (40) | 24 (48) | 2.4 (0.7) |
| Item 16 | 1 (2) | 19 (38) | 18 (36) | 12 (24) | 1.6 (0.7) |
| Item 17 | 0 (0) | 5 (10) | 21 (42) | 24 (48) | 2.0 (0.7) |
| Item 18 | 1 (2) | 22 (44) | 22 (44) | 5 (10) | 2.1 (0.7) |
| Item 19 | 0 (0) | 12 (24) | 25 (50) | 13 (26) | 2.3 (0.6) |
| Item 20 | 0 (0) | 9 (18) | 28 (56) | 13 (26) | 2.5 (0.5) |
